# Supplementary figures and images for: Magnetoresponsive, anisotropic composite particles reversibly changing their chain lengths by a combined external field
Source: Royal Society of Chemistry journal article supplement (doi:10.1039/c2sm26285a), 2012-01-01

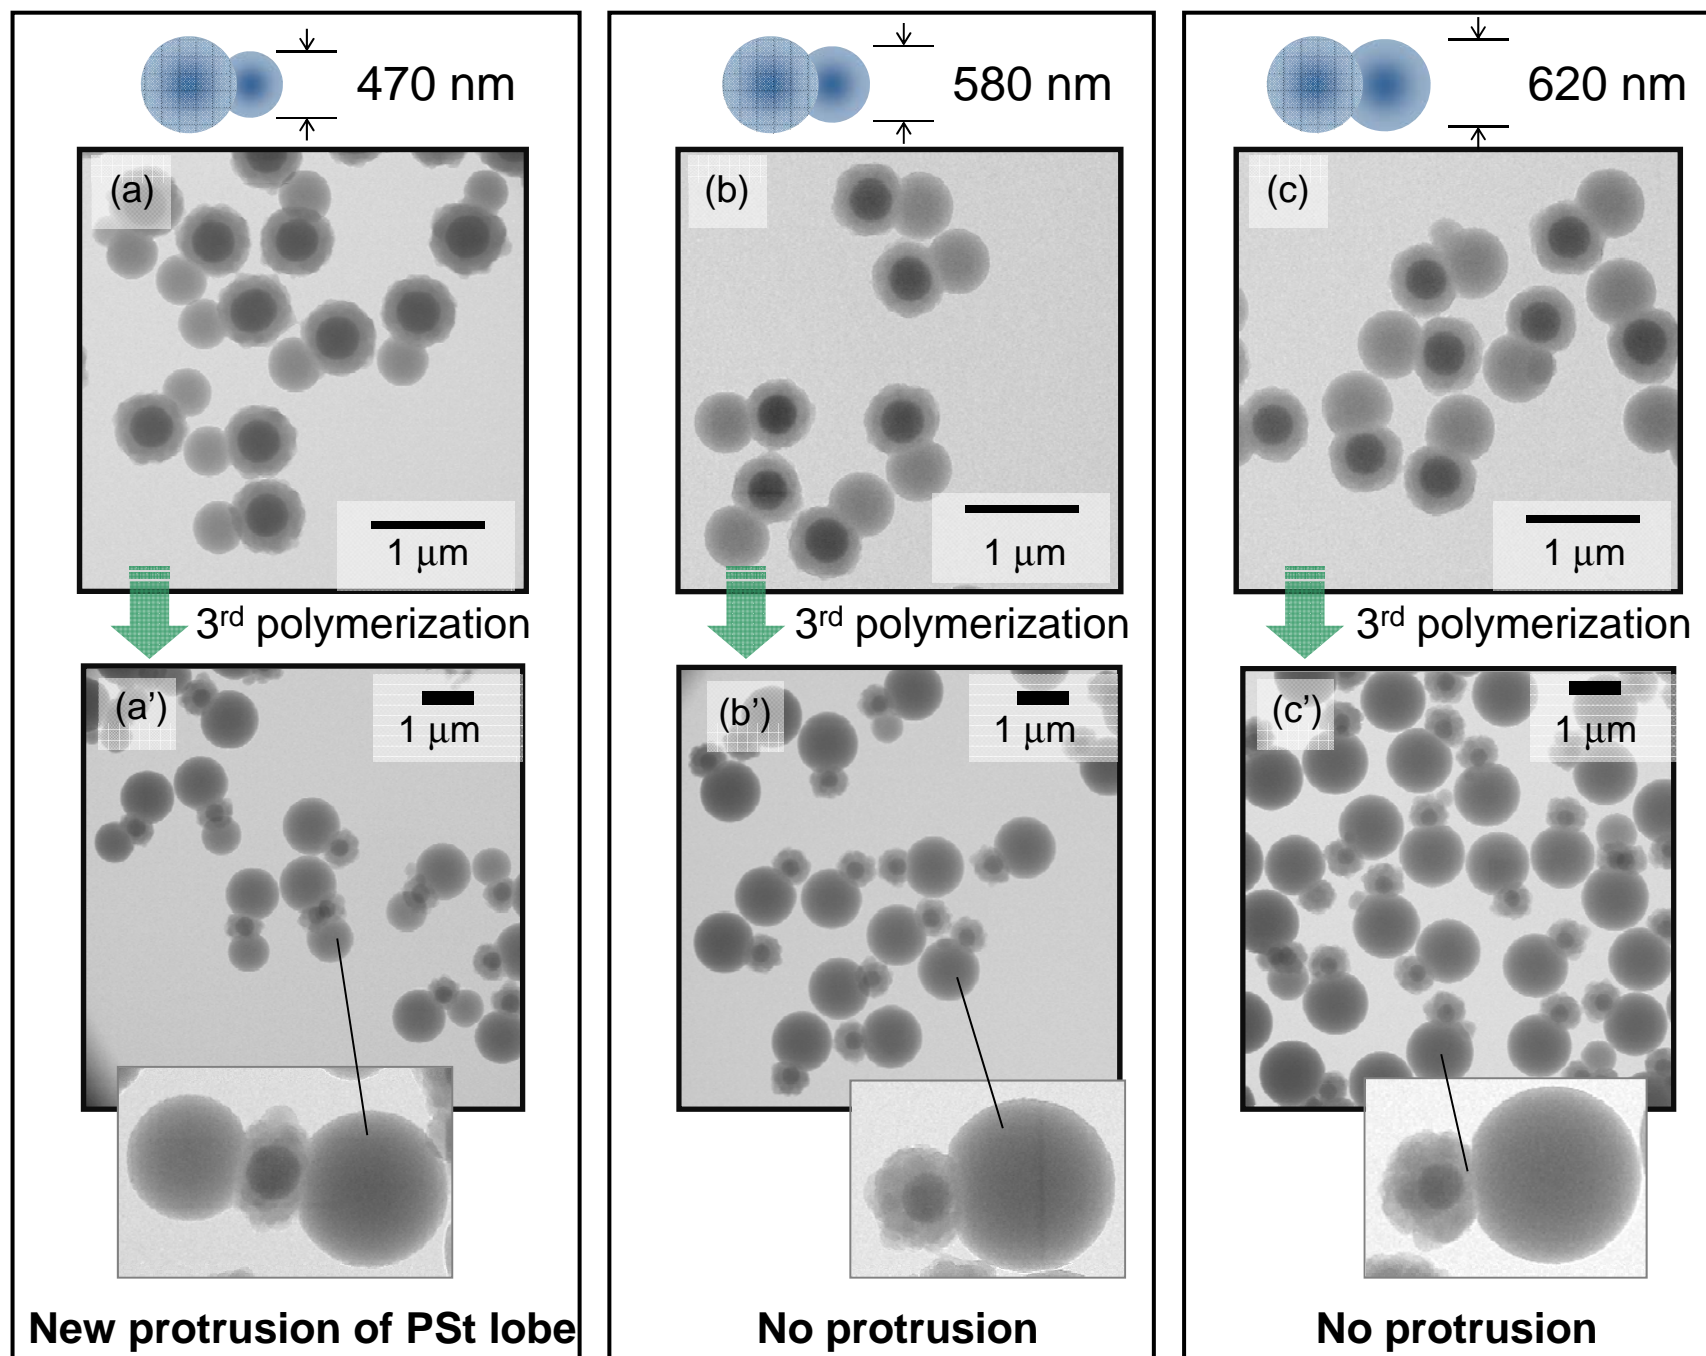

Fig. S1 Dependence of PSt protrusion on the PSt size of dimer composite particles

Supplement: c2sm26285a.pdf [file c2sm26285a.pdf]
